# Supplementary material for: A novel Cu(II)-W(V) bimetallic assembly magnet {[Cu(en)2]3[W(CN)8]2·H2O}∞ (en = ethylenediamine) with cube-like W8Cu12 units from a coordinated anion template self-assembly reactionElectronic supplementary information (ESI) available: selected hydrogen bonding parameters in 1 (Table S1) and perspective view showing the three linkages for the title compound (Fig. S1). See http://www.rsc.org/suppdata/nj/b1/b108791f/
Source: Royal Society of Chemistry journal article supplement (doi:10.1039/b108791f), 2002-03-08
Supplement: b108791f.pdf [file b108791f.pdf]

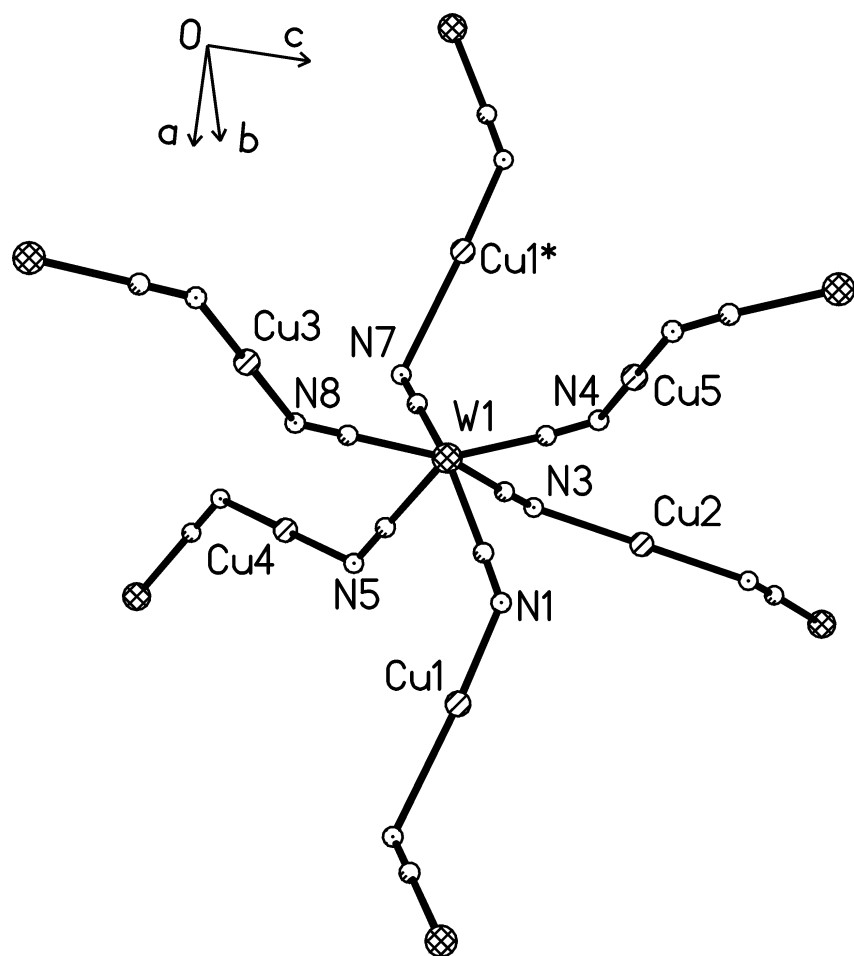

Fig. S1 Perspective view showing the three linkages for the title compound.

Unrelated atoms are omitted for clarity. \*  $x - 1, y, z$ .
